# Supplementary material
Source: PubMed Central journal article supplement (PMC10592104)
Supplement: NIHMS1927275-supplement-3.pdf [file NIHMS1927275-supplement-3.pdf]

| <b>A Species</b>                 | <b>Sequence of mature pheromone</b> | <b>Copies in genome</b> |
|----------------------------------|-------------------------------------|-------------------------|
| <i>Saccharomyces cerevisiae</i>  | YIIKGVFWD PAC(S-farnesyl)           | 1                       |
|                                  | YIIKGLFWD PAC(S-farnesyl)           | 1                       |
| <i>Vanderwaltozyma polyspora</i> | YIVKGVFWD PEC(S-farnesyl)           | 3                       |
| <i>Kluyveromyces lactis</i>      | WIIPGFVWPQC(S-farnesyl)             | 1                       |
| <i>Komagatella pastoris</i>      | SNQVYYGGNRYLALYGC(S-farnesyl)       | 1                       |
|                                  | SHQVYHNGNKYLALYGC(S-farnesyl)       | 1                       |
| <i>Candida albicans</i>          | AVRSVSTGNCCSTC(S-farnesyl)          | 1                       |
| <i>Schizosaccharomyces pombe</i> | YTPKVPYMC(S-farnesyl)               | 3                       |

  

| <b>B CAAX motif identified from</b>         | <b>Position A<sub>1</sub></b> | <b>Position A<sub>2</sub></b> | <b>Position X</b>   |
|---------------------------------------------|-------------------------------|-------------------------------|---------------------|
| Known Ascomycota pheromones                 | A I L M S T V                 | A I L M S T V                 | A C L M Q S V       |
| Mutational analysis in <i>S. cerevisiae</i> | A D G I L S T V               | A G H I L M N Q S T V         | A C G I L M Q S N V |
| Final algorithmic filter                    | A D G I L S T V               | A G H I L M N Q S T V         | A C G I L M Q S N V |

**Figure S1. Yeast peptide pheromones share common maturation motifs. Related to Figure 1.** (A) Lipidated peptide pheromones (*Sca*-factor like) of yeast species (Saccharomycotina) verified by biochemistry or genetics. Yeasts have different numbers of genes in their genomes encoding identical or near-identical mature pheromone sequences. Note that *S. cerevisiae* and *K. pastoris* each have two pheromone genes, differing from each other by a single amino acid change. (B) The farnesylation [CAAX] motif is defined by cysteine that is S-farnesylated, followed by two aliphatic residues (AA) and a final variable residue (X). (Top row) Known yeast pheromones provide a collection of possible AAX amino acid residues to identify unannotated pheromone CAAX motifs in the genome. (Middle row) To ensure that the filter is not biased by the few known pheromones we expanded the dictionaries used in our filter to include alternate residues that maintain farnesylation in *S. cerevisiae*<sup>22-24</sup>. Our final filter thus searches for all possible [CAAX-stop] motifs with A<sub>1</sub>, A<sub>2</sub>, X being any of the residues in the bottom row.

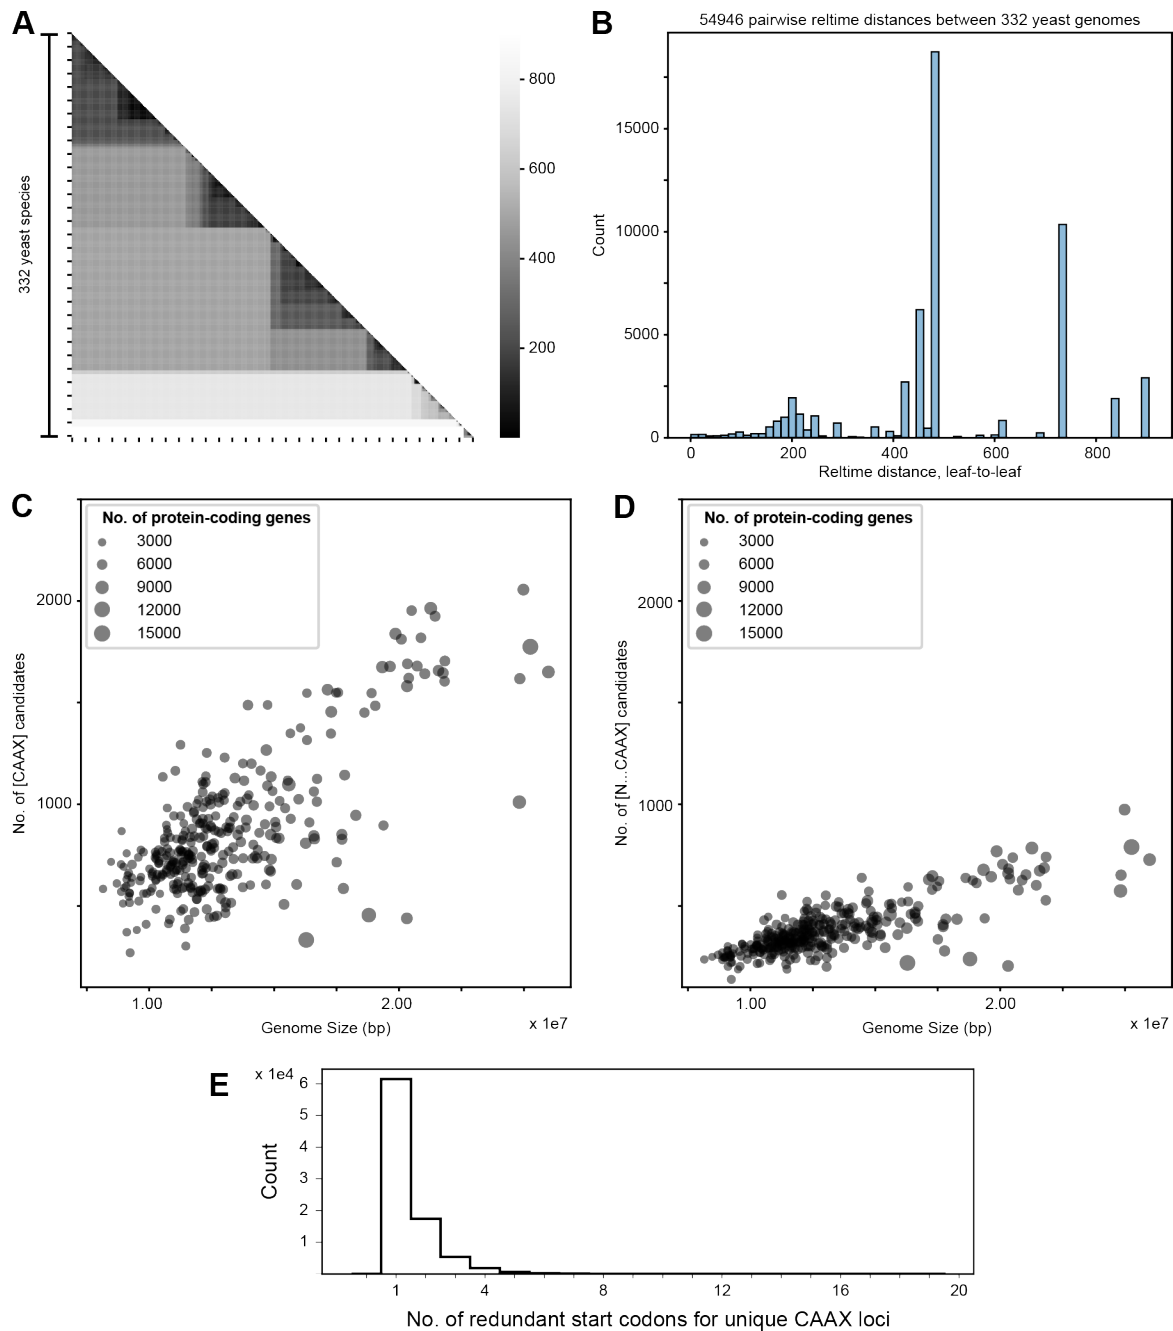

**Figure S2. Successive filters reduce the number of candidate pheromone loci. Related to Figure 2.** (A) Matrix heatmap showing the pairwise distances amongst 332 sequenced yeast genomes evaluated using a time-calibrated species divergence tree<sup>27</sup> produced by the RelTime algorithm<sup>27, 59</sup>. The scale bar indicates pairwise distance between extant species in millions of years. (B) Histogram of phylogenetic distances between pairs of species from the heatmap confirms a hierarchical connection between clades, with yeasts within the same clade more related to each other than to species from different clades. (C, D) Scatter plots of the number of [CAAX] candidates (C) and [N...CAAX] candidates (D) plotted against the genome size, where each circle represents a genome, and the diameter of the circles represents the number of annotated protein-coding genes in the genome (overlapping circles produce darker grays).

Adding a second filter (the requirement of an upstream proteolytic site in frame with a C-terminal prenylation motif [CAAX] to generate the paired motifs [N...CAAX]) reduces the number of candidate pheromone loci. (E) The number of start codons in frame and within 300 bp upstream of a unique CAAX sequence that satisfies the [N...CAAX] paired motifs.

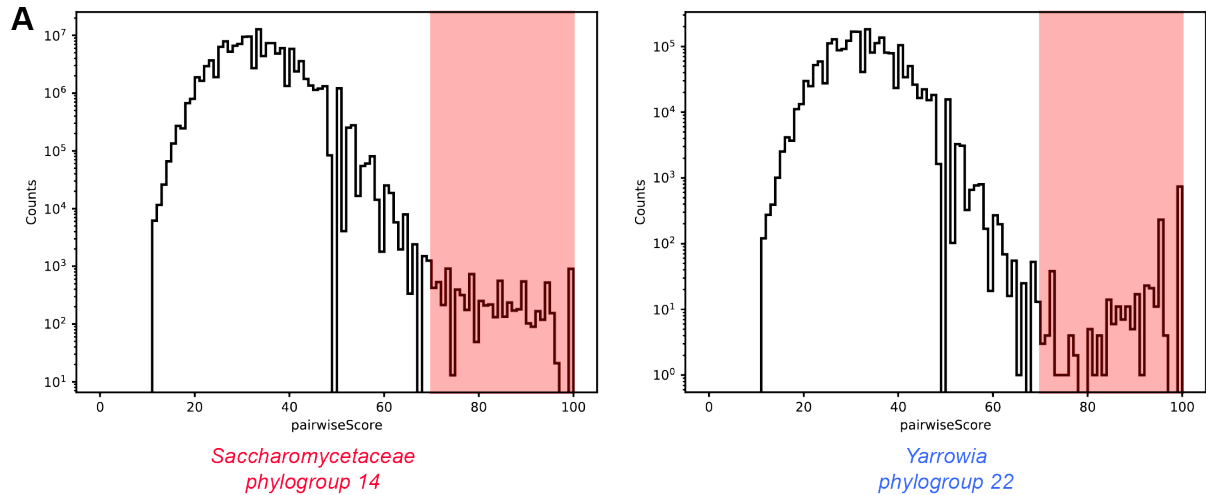

**B**

| Phylogroup    | Clade name                            | No. species with identified pheromone | No. species with no identified pheromone | Species with no identified pheromone                                                                                                                                                                                                                                                                                                                                                                                                                                                                                                                                                                                                                                                                                                                                                                                                                                                                             |
|---------------|---------------------------------------|---------------------------------------|------------------------------------------|------------------------------------------------------------------------------------------------------------------------------------------------------------------------------------------------------------------------------------------------------------------------------------------------------------------------------------------------------------------------------------------------------------------------------------------------------------------------------------------------------------------------------------------------------------------------------------------------------------------------------------------------------------------------------------------------------------------------------------------------------------------------------------------------------------------------------------------------------------------------------------------------------------------|
| phylogroup 1  | Debaryomycetaceae / Metschnikowiaceae | 70                                    | 21                                       | <i>yHMPu5000034988_candida_fructus_160519</i> , <i>lodderomyces_elongisporus</i> , <i>yHMPu5000035297_priceomyces_castillae_160928</i> , <i>scheffersomyces_stipitis</i> , <i>candida_sojae</i> , <i>yHMPu5000035335_candida_blattae_160928</i> , <i>yHMPu5000034632_candida_athensensis_160519</i> , <i>clavispora_lusitaniae</i> , <i>wickerhamia_fluorescens</i> , <i>hyphopichia_burtonii</i> , <i>yHMPu5000034986_candida_oregonensis_160519</i> , <i>yHMPu5000035662_meyerozyma_caribbica_160613</i> , <i>yHMPu5000035296_priceomyces_carsonii_160928</i> , <i>yHMPu5000034973_danielozyma_ontarioensis_160519</i> , <i>millerozyma_acaciae</i> , <i>meyerozyma_guilliermondii</i> , <i>yHMPu5000041855_candida_ascalaphidarum_160928</i> , <i>yHMPu5000034606_priceomyces_medius_160519</i> , <i>candida_tenuis</i> , <i>priceomyces_haplophilus</i> , <i>yHMPu5000041713_debaryomyces_maramus_160928</i> |
| phylogroup 10 | Pichiaceae                            | 41                                    | 11                                       | <i>yHMPu5000034614_saturnispora_silvae_160519</i> , <i>ogataea_methanolica</i> , <i>yHMPu5000034625_pichia_kudriavzevii_160519</i> , <i>yHMPu5000034886_ogataea_trehalophila_160519</i> , <i>yHMPu5000034622_pichia_occidentalis_160519</i> , <i>yHMPu5000034904_ogataea_nonfermentans_160519</i> , <i>pichia_membranifaciens</i> , <i>yHMPu5000034903_ogataea_naganishii_160519</i> , <i>yHMPu5000034611_saturnispora_mendoncae_160519</i> , <i>candida_succiphila</i> , <i>candida_arabinofermentans</i>                                                                                                                                                                                                                                                                                                                                                                                                       |
| phylogroup 13 | Saccharomycodaceae                    | 8                                     | 0                                        |                                                                                                                                                                                                                                                                                                                                                                                                                                                                                                                                                                                                                                                                                                                                                                                                                                                                                                                  |
| phylogroup 14 | Saccharomycetaceae                    | 71                                    | 0                                        |                                                                                                                                                                                                                                                                                                                                                                                                                                                                                                                                                                                                                                                                                                                                                                                                                                                                                                                  |
| phylogroup 17 | Phaffomycetaceae                      | 30                                    | 0                                        |                                                                                                                                                                                                                                                                                                                                                                                                                                                                                                                                                                                                                                                                                                                                                                                                                                                                                                                  |
| phylogroup 22 | <i>Yarrowia</i>                       | 5                                     | 0                                        |                                                                                                                                                                                                                                                                                                                                                                                                                                                                                                                                                                                                                                                                                                                                                                                                                                                                                                                  |

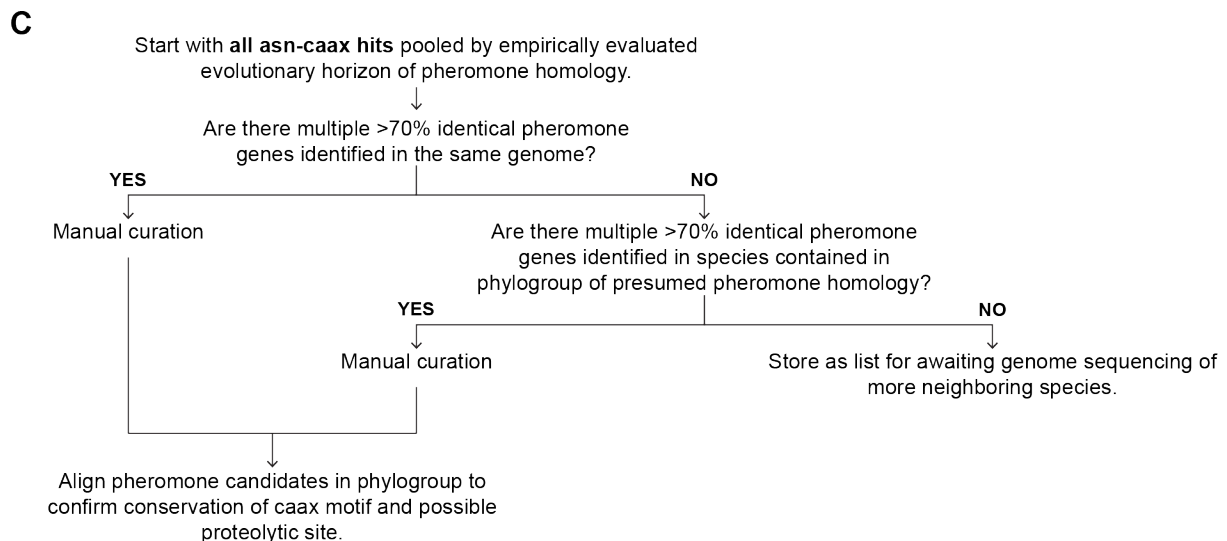

**Figure S3. Manual curation from candidates that have homologous copies within a phylogroup identifies good pheromone candidates in most species. Related to Figure 3. (A)** Histograms of pairwise sequence identity between all [N...CAAX] candidates (calculated from potential proteolysis site to stop) identified from genomes within a phylogroup where pheromones are expected to be conserved. Because these species should have homologous pheromones, their pheromones are likely found among candidate pairs that are more than 85% identical (red shaded region). Sample histograms from phylogroup 14 (Saccharomycetaceae) and phylogroup 22 (Yarrowia) are shown. **(B)** Tabulated list of large phylogroups (with more than 5 species) where a pheromone candidate has been identified by criteria-based curation. Species with no pheromone identified by curation are listed. **(C)** Decision tree describing criterion-based procedure to identify candidate pheromones from all [N...CAAX] candidates.





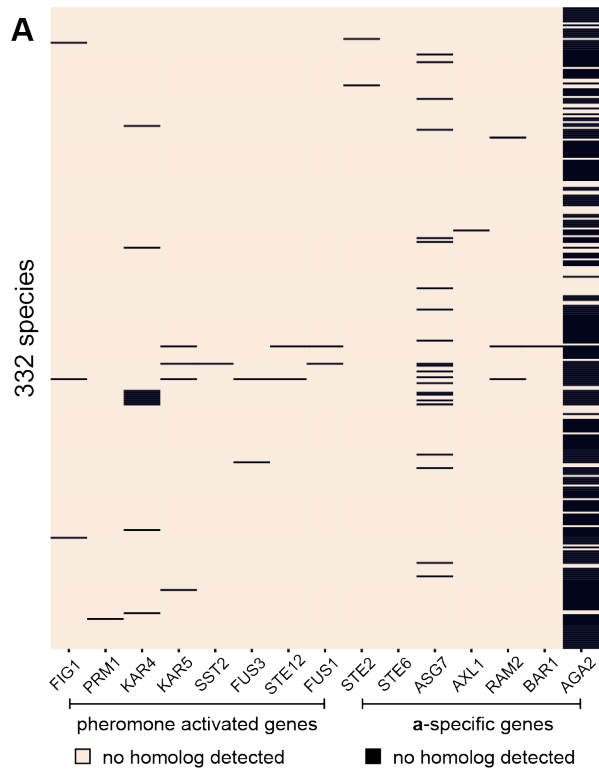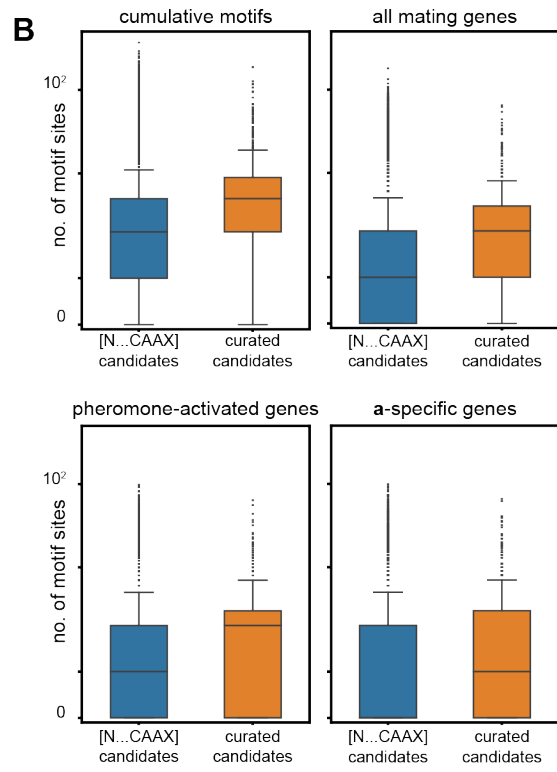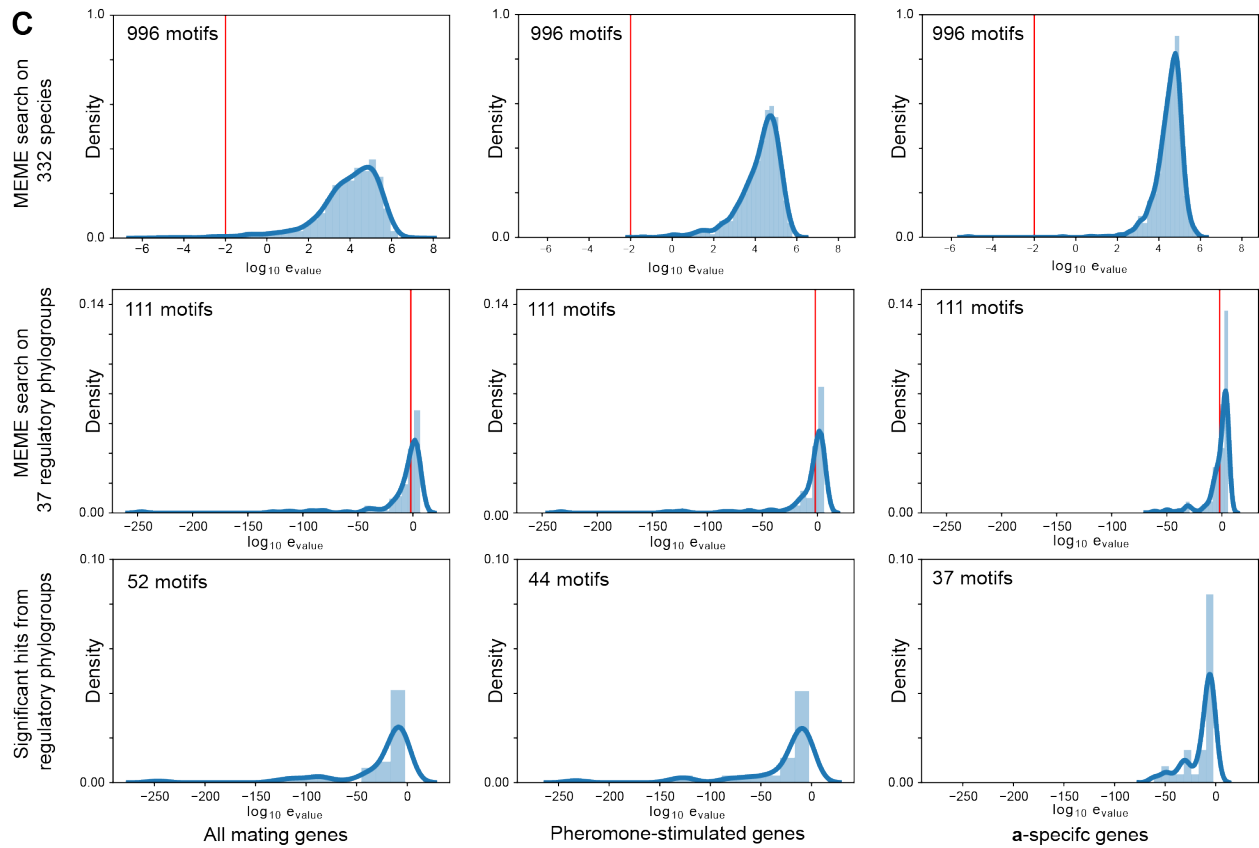



**Figure S6. Best pheromone candidates are weakly associated with motifs that regulate other mating genes. Related to Figure 3, Figure 4, Table 1 and Table S1.** (A) We considered 15 genes essential to mating in *S. cerevisiae* that are either induced by pheromone stimulation or specifically induced in **a**-like haploid cells (see labels at bottom). The figure represents the sequences of 332 yeast genomes (rows) and the detection of homologs of each of these 15 specific mating genes (columns), with a black bar showing the failure to detect a homolog of the mating gene in a particular genome. (B) We built phylogenetic groups assuming a maximum evolutionary distance at which mating genes share conserved regulatory motifs, operationally defined by the divergence time of *S. cerevisiae* and *Vanderwaltozyma polyspora*, whose pheromone genes share conserved regulatory DNA sequences<sup>45</sup> (Figure S7). Although true candidates are not clearly identified by the presence of mating regulatory motifs in their promoters, there is a noticeable enrichment of motifs identified using all mating genes, pheromone-activated genes, **a**-specific genes, or the sum of all identified motifs of every class (cumulative) upstream of manually curated candidates (orange) compared to the remaining candidates that have a homologous copy in genomes of the conserved-pheromone phylogroup (blue). Each box plot represents the distribution of motif counts upstream of every candidate, with the midline representing the median, the box and whiskers representing quartiles, and the dots representing outliers. The enrichment of MEME identified motifs upstream of curated candidates are found to be significant using a two-sample Kolmogorov-Smirnov test. (C) Histograms of e-values of MEME motifs identified in promoters of all mating genes (left), pheromone-activated genes (middle) or **a**-specific genes (right). (Top row) Motifs identified when analysis is done in individual species. This analysis does not identify many significant MEME motifs (e-value < 0.01, red line highlighting significance threshold). (Middle row) When all mating gene promoters are pooled across species in conserved-mating-regulation phylogroups (290 species across 37 phylogroups), several significant motifs are identified (e-value < 0.01, red line highlighting significance threshold). (Bottom row) Histograms of e-values of significant MEME motifs identified from analyzing all 290 genomes from 37 mating regulation conserved phylogroups collectively for all mating genes (52 motifs), pheromone-stimulated genes (44 motifs) and **a**-specific genes (37 motifs) in 266 genomes.

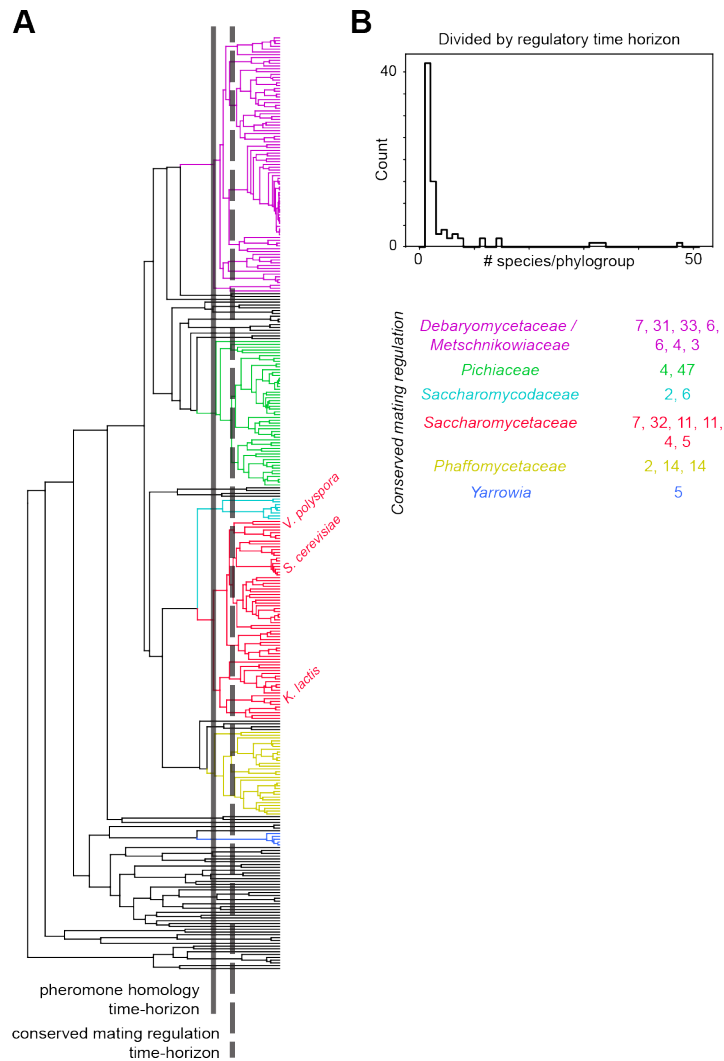

**Figure S7. Phylogenetically related species can be grouped based on conservation of regulatory elements of mating genes. Related to Figure 3, Table 1 and Table S1. (A)** Phylogenetic tree describing the evolutionary relationship of 332 yeasts with two horizons indicated. The dashed grey line indicates the assumed maximum evolutionary distance at which species are expected to share mating regulation, operationally defined by the divergence time of *S. cerevisiae* and *Vanderwaltozyma polyspora*, whose pheromone genes share conserved regulatory DNA sequences<sup>45</sup>. **(B)** Phylogroups expected to share mating regulation are smaller than those of conserved pheromones, with the larger clades divided between multiple phylogroups as indicated; 290 genomes are distributed across 37 mating regulation phylogroups of at least 2 species; there are also 42 singleton species.

| <b>Species name</b>                                 | <b>Number of predicted pheromone genes</b> | <b>Mature pheromone sequence</b> |
|-----------------------------------------------------|--------------------------------------------|----------------------------------|
| <i>Yarrowia lipolytica</i> CLIB122                  | 4                                          | SNVTIVGGYRTFQPSSC                |
| <i>Yarrowia deformans</i> JCM1694<br>BCIW[NCBI]     | 7                                          | SNVTIVGGYRTYQPSSC                |
| <i>Yarrowia divulgata</i> YADI0[NCBI]               | 10                                         | SNVTIVGGYRTYQPSSC                |
| <i>Yarrowia keelungensis</i> JCM14894<br>BCJD[NCBI] | 9                                          | SNVTIVGGYRTYQPSSC                |
| <i>Yarrowia</i> sp. JCM30695 BCLX[NCBI]             | 9                                          | SNVTIVGGYRTYQPSSC                |
| <i>Yarrowia bubula</i> YABU0[NCBI]                  | 14                                         | SNVTIVGGYRTYQPSSC                |

**Table S3. Conserved pheromone candidates in *Yarrowia* clade. Related to Figure 5 and Table S4.**

| <b>Species name</b>                          | <b>Chromosome[coordinates]*</b>      | <b>Pheromone candidate sequence</b>                                                                   |                                         |
|----------------------------------------------|--------------------------------------|-------------------------------------------------------------------------------------------------------|-----------------------------------------|
| Yarrowia lipolytica CLIB122                  | YALI0F[2139263-2139374]              | MSKAI PRAYGTDSYRVNSNVTIVGGYRTFQPSSCVIA*                                                               |                                         |
|                                              | YALI0F[2134586-2134697]              | MSKAI PRAYGTDSYRVNSNVTIVGGYRTFQPSSCVIA*                                                               |                                         |
|                                              | YALI0E[1012402-1012291]              | MSKAI PRDYGTDSYRVNSNVTIVGGYRTFQPSSCVIA*                                                               |                                         |
| Yarrowia deformans_JCM_1694_B<br>CIW_NCBI    | YALI0F[1323505-1323342]              | MSKAI PRDYGTDSYRVNSNVTIVGGYRTFQPSSCVIA*                                                               |                                         |
|                                              | BCIW01000013.1[569522-569414]        | MSVVKREYGNESYRVNSNVTIVGGYRTYQPSSCVIA*                                                                 |                                         |
|                                              | BCIW01000004.1[359951-360221]        | MIMETTETPALRASIRYQKPLQTHINISNLLQFPKQP<br>TPTTTITTTTTTTTMSVVKREYGNQSYRVNSNVTIVGGYR<br>TYQPSSCVIA*      |                                         |
|                                              | BCIW01000017.1[66377-66647]          | MTYNFIGSSYLEHYQVANSNTSPSKYKYLPTSTILELQQTTK<br>TTTTPTTTTTTTTTMSVVKREYGNDSYRVNSNVTIVGGYR<br>TYQPSSCVIA* |                                         |
|                                              | BCIW01000004.1[144986-144878]        | MSVVKREYGNDSYRVNSNVTIVGGYRTYQPSSCVIA*                                                                 |                                         |
|                                              | BCIW01000004.1[511956-512064]        | MSVVKREYGNESYRVNSNVTIVGGYRTYQPSSCVIA*                                                                 |                                         |
|                                              | BCIW01000010.1[912729-912837]        | MSVVKREYGNESYRVNSNVTIVGGYRTYQPSSCVIA*                                                                 |                                         |
|                                              | BCIW01000008.1[69294-69186]          | MSVVKREYGNDSYRVNSNVTIVGGYRTYQPSSCVIA*                                                                 |                                         |
|                                              | Yarrowia divulgata_YAD10_NCBI        | flattened_line_47[116579-116471]                                                                      | MSVVKREYGNESYRVNSNVTIVGGYRTYQPSSCVIA*   |
|                                              |                                      | flattened_line_167[3926-4034]                                                                         | MSVVKREYGNESYRVNSNVTIVGGYRTYQPSSCVIA*   |
| flattened_line_147[29621-29513]              |                                      | MSVVKREYGNESYRVNSNVTIVGGYRTYQPSSCVIA*                                                                 |                                         |
| flattened_line_346[7340-7448]                |                                      | MSVVKREYGNESYRVNSNVTIVGGYRTYQPSSCVIA*                                                                 |                                         |
| flattened_line_141[50636-50744]              |                                      | MSVVKREYGNQSYRVNSNVTIVGGYRTYQPSSCVIA*                                                                 |                                         |
| flattened_line_19[220678-220786]             |                                      | MSVVKREYGNQSYRVNSNVTIVGGYRTYQPSSCVIA*                                                                 |                                         |
| flattened_line_79[12173-12281]               |                                      | MSVVKREYGNQSYRVNSNVTIVGGYRTYQPSSCVIA*                                                                 |                                         |
| flattened_line_368[2146-2038]                |                                      | MSVVKREYGNQSYRVNSNVTIVGGYRTYQPSSCVIA*                                                                 |                                         |
| flattened_line_159[57250-57358]              |                                      | MSVVKREYGNQSYRVNSNVTIVGGYRTYQPSSCVIA*                                                                 |                                         |
| flattened_line_195[32625-32733]              |                                      | MSVVKREYGNQSYRVNSNVTIVGGYRTYQPSSCVIS*                                                                 |                                         |
| Yarrowia keelungensis_JCM_14894<br>BCJD_NCBI | BCJD01000001.1[540603-540381]        | MDSRQYNNFYSPQYKYHLNPPLFLHQSTTTTTTTTTMGS<br>AIPRAYGTDSYRVNSNVTIVGGYRTYQPSSCVIA*                        |                                         |
|                                              | BCJD01000001.1[242794-242683]        | MGSAIPRAYGTDSYRVNSNVTIVGGYRTYQPSSCVIA*                                                                |                                         |
|                                              | BCJD01000006.1[423585-423474]        | MGSAIPRAYGTDSYRVNSNVTIVGGYRTYQPSSCVIA*                                                                |                                         |
|                                              | BCJD01000001.1[402036-401925]        | MGSAIPRAYGTDSYRVNSNVTIVGGYRTYQPSSCVIA*                                                                |                                         |
|                                              | BCJD01000001.1[264198-264309]        | MGSAIPRAYGTDSYRVNSNVTIVGGYRTYQPSSCVIA*                                                                |                                         |
|                                              | BCJD01000003.1[907356-907467]        | MGEAIPRAYGTDSYRVNSNVTIVGGYRTYQPSSCVIA*                                                                |                                         |
|                                              | BCJD01000004.1[1838215-1838326]      | MGEAIPRAYGTDSYRVNSNVTIVGGYRTYQPSSCVIA*                                                                |                                         |
|                                              | BCJD01000002.1[338601-338490]        | MGSAIPRRYGTASYRVNSNVTIVGGYRTYQPSSCVIS*                                                                |                                         |
|                                              | BCJD01000001.1[1692828-1692717]      | MGSAIPRRYGTASYRVNSNVTIVGGYRTYQPSSCVIA*                                                                |                                         |
|                                              | Yarrowia sp._JCM_30695_BCLX_<br>NCBI | BCLX01000001.1[2795617-2795728]                                                                       | MGSAIPRAYGTDSYRVNSNVTIVGGYRTYQPSSCVIA*  |
| BCLX01000001.1[3085794-3085905]              |                                      | MGSAIPRAYGTDSYRVNSNVTIVGGYRTYQPSSCVIA*                                                                |                                         |
| BCLX01000007.1[1018344-1018455]              |                                      | MGSAIPRAYGTDSYRVNSNVTIVGGYRTYQPSSCVIA*                                                                |                                         |
| BCLX01000001.1[2934643-2934754]              |                                      | MGSAIPRAYGTDSYRVNSNVTIVGGYRTYQPSSCVIA*                                                                |                                         |
| BCLX01000001.1[3073012-3072901]              |                                      | MGSAIPRAYGTDSYRVNSNVTIVGGYRTYQPSSCVIA*                                                                |                                         |
| BCLX01000005.1[1822017-1821906]              |                                      | MGEAIPRAYGTDSYRVNSNVTIVGGYRTYQPSSCVIA*                                                                |                                         |
| BCLX01000002.1[3456539-3456650]              |                                      | MGEAIPRAYGTDSYRVNSNVTIVGGYRTYQPSSCVIA*                                                                |                                         |
| BCLX01000001.1[1641875-1641986]              |                                      | MGSAIPRRYGTASYRVNSNVTIVGGYRTYQPSSCVIA*                                                                |                                         |
| BCLX01000002.1[771285-771174]                |                                      | MGSAIPRRYGTASYRVNSNVTIVGGYRTYQPSSCVIS*                                                                |                                         |
| Yarrowia bubula_YABU0_NCBI                   |                                      | flattened_line_177[13360-13477]                                                                       | MSGSAIPRDYGNESYRVNSNVTIVGGYRTYQPSSCVIA* |

|                                  |                                                                                      |
|----------------------------------|--------------------------------------------------------------------------------------|
| flattened_line_4[53746-53920]    | MSTPVFIFHQTTTTTTTTMSGSKAIPRDYGNESYRVNSN<br>VTIVGGYRTYQPSSCVIA*                       |
| flattened_line_73[126719-126836] | MSGSKAIPRDYGNESYRVNSNVTIVGGYRTYQPSSCVIA*                                             |
| flattened_line_135[11955-12072]  | MSGSKAIPRDYGNQSYRVNSNVTIVGGYRTYQPSSCVIA*                                             |
| flattened_line_57[58408-58171]   | MYPSLKCSFSAKSILHCFILQYINPSSPPQITTKHHTLSL<br>MSGSKAIPRDYGNQSYRVNSNVTIVGGYRTYQPSSCVIA* |
| flattened_line_247[9255-9372]    | MSGSKAIPRDYGNQSYRVNSNVTIVGGYRTYQPSSCVIA*                                             |
| flattened_line_4[407758-407641]  | MSGSKAIPRDYGNQSYRVNSNVTIVGGYRTYQPSSCVIA*                                             |
| flattened_line_169[18491-18608]  | MSGSKAIPRDYGNQSYRVNSNVTIVGGYRTYQPSSCVIA*                                             |
| flattened_line_29[80548-80431]   | MAGSKAIPRDYGNQSYRVNSNVTIVGGYRTYQPSSCVIA*                                             |
| flattened_line_0[542840-542723]  | MSGSKAIPRNYGNQSYRVNSNVTIVGGYRTYQPSSCVIA*                                             |
| flattened_line_95[139800-139917] | MSGSKAIPRNYGNQSYRVNSNVTIVGGYRTYQPSSCVIA*                                             |
| flattened_line_227[37480-37597]  | MSGSKAIPRNYGNQSYRVNSNVTIVGGYRTYQPSSCVIA*                                             |
| flattened_line_129[79430-79547]  | MSGSKAIPRNYGNQSYRVNSNVTIVGGYRTYQPSSCVIA*                                             |
| flattened_line_55[78869-78986]   | MSGSRAIPRNYGNQSYRVNSNVTIVGGYRTYQPSSCVIA*                                             |

**Table S4. Pheromone candidates identified in *Yarrowia* strains in this study. Related to Figure 5 and Table S3.**

\*Contig/chromosome identifier and genome coordinates are provided for reference.

| <i>Y. lipolytica</i> strain label | Genotype*                                                        | Source                               |
|-----------------------------------|------------------------------------------------------------------|--------------------------------------|
| ML16507                           | <i>MATA; ura3-302; leu2-270; lys1-11; Ku70Δ</i>                  | Gift from Joshua Truehart (DSM ltd.) |
| ML16510                           | <i>MATB; ura2-6861; leu2-3; ade1; Ku70Δ</i>                      | Gift from Joshua Truehart (DSM ltd.) |
| yaliSS001                         | ML16507; <i>Ylste2Δ:LEU2YI</i>                                   |                                      |
| yaliSS005                         | ML16507; <i>Ylste6Δ:LEU2YI</i>                                   | This study                           |
| yaliSS007                         | ML16507; <i>Ylmfa2Δ:URA3YI</i>                                   | This study                           |
| yaliSS009                         | ML16507; <i>Ylmfa1Δ:URA3YI</i>                                   | This study                           |
| yaliSS011                         | ML16507; <i>Ylmfa3Δ:URA3YI</i>                                   | This study                           |
| yaliSS017, yaliSS018              | ML16507; <i>Ylmfa1Δ:LEU2YI, Ylmfa2Δ:URA3YI</i>                   | This study                           |
| yaliSS019, yaliSS020              | ML16507; <i>Ylmfa2Δ:URA3YI, Ylmfa3Δ:LEU2YI</i>                   | This study                           |
| yaliSS021, yaliSS022              | ML16507; <i>Ylmfa1Δ:LEU2YI, Ylmfa3Δ:URA3YI</i>                   | This study                           |
| yaliSS023, yaliSS024              | ML16507; <i>Ylmfa2Δ:LEU2YI, Ylmfa3Δ:URA3YI</i>                   | This study                           |
| yaliSS027, yaliSS028              | ML16507; <i>Ylmfa1Δ</i>                                          | This study                           |
| yaliSS029, yaliSS030              | ML16507; <i>Ylmfa1Δ, Ylmfa3Δ:LEU2YI</i>                          | This study                           |
| yaliSS031, yaliSS032              | ML16507; <i>Ylmfa1Δ, Ylmfa2Δ:URA3YI, Ylmfa3Δ:LEU2YI</i>          | This study                           |
| yaliSS035, yaliSS036              | ML16507; <i>Ylmfa1Δ, Ylmfa4Δ</i>                                 | This study                           |
| yaliSS037                         | ML16507; <i>Ylmfa1Δ, Ylmfa2Δ:LEU2YI, Ylmfa4Δ</i>                 | This study                           |
| yaliSS039, yaliSS040              | ML16507; <i>Ylmfa1Δ, Ylmfa3Δ:LEU2YI, Ylmfa4Δ</i>                 | This study                           |
| yaliSS041                         | ML16507; <i>Ylmfa1Δ, Ylmfa2Δ:LEU2YI, Ylmfa3Δ:URA3YI, Ylmfa4Δ</i> | This study                           |
| yaliSS045, yaliSS046              | ML16507; <i>Ylmfa4Δ</i>                                          | This study                           |
| yaliSS047                         | ML16507; <i>Ylmfa1Δ, Ylmfa2Δ:LEU2YI, Ylmfa3Δ, Ylmfa4Δ</i>        | This study                           |

| Label         | Chromosomal position**                       |
|---------------|----------------------------------------------|
| <i>YIMFA1</i> | Yali0F_6  [forward][2134586-2134685-2134697] |
| <i>YIMFA2</i> | Yali0F_6  [forward][2139263-2139362-2139374] |
| <i>YIMFA3</i> | Yali0E_5  [reverse][1012402-1012303-1012291] |
| <i>YIMFA4</i> | Yali0F_6  [reverse][1323505-1323356-1323344] |

**Table S5 *Y. lipolytica* strains used in this study. Related to STAR Methods.**

\*In *Y. lipolytica*, MATA and MATB mating-types are equivalent to MATa and MATα of *S. cerevisiae* respectively.

\*\*Candidates located by contigID||[strand][“Start-Cys-Stop” position in contig].

| <b>Primer</b> | <b>Sequence</b>           | <b>Purpose</b>                                             |
|---------------|---------------------------|------------------------------------------------------------|
| oSS10_121     | TGCTCTGCATCATGGGTCGT      | PCR amplification of <i>YIMFA1</i> locus – forward primer. |
| oSS10_124     | AAGGACGGTAGCGTCAAGCA      | PCR amplification of <i>YIMFA1</i> locus – reverse primer. |
| oSS10_129     | GCCATTGCTCCTCCCACAAC      | PCR amplification of <i>YIMFA2</i> locus – forward primer. |
| oSS10_132     | CCATCTACGCCGAGGGAGTC      | PCR amplification of <i>YIMFA2</i> locus – reverse primer. |
| oSS10_137     | TTACGGCGGCTTTGAGACGA      | PCR amplification of <i>YIMFA3</i> locus – forward primer. |
| oSS10_141     | TGACCGAGATTGGAGACGCC      | PCR amplification of <i>YIMFA3</i> locus – reverse primer. |
| oSS10_213     | AGCACACATTTCGCTTGTCTCAAAT | PCR amplification of <i>YIMFA4</i> locus – forward primer. |
| oSS10_216     | CCCGTTGGTTTCGGTATCAAGAAG  | PCR amplification of <i>YIMFA4</i> locus – reverse primer. |

**Table S6 Primers used for verifying genome deletions. Related to STAR Methods.**

NOTE: Primers were used to check for genome deletions of pheromone candidates.
